# Supplementary material for: Harmonisation of methane isotope ratio measurements from different laboratories using atmospheric samples
Source: Copernicus journal article supplement (doi:10.5194/egusphere-2025-2439), 2025-06-05
Supplement: Supplementary file 1 [file egusphere-2025-2439-supplement.pdf]

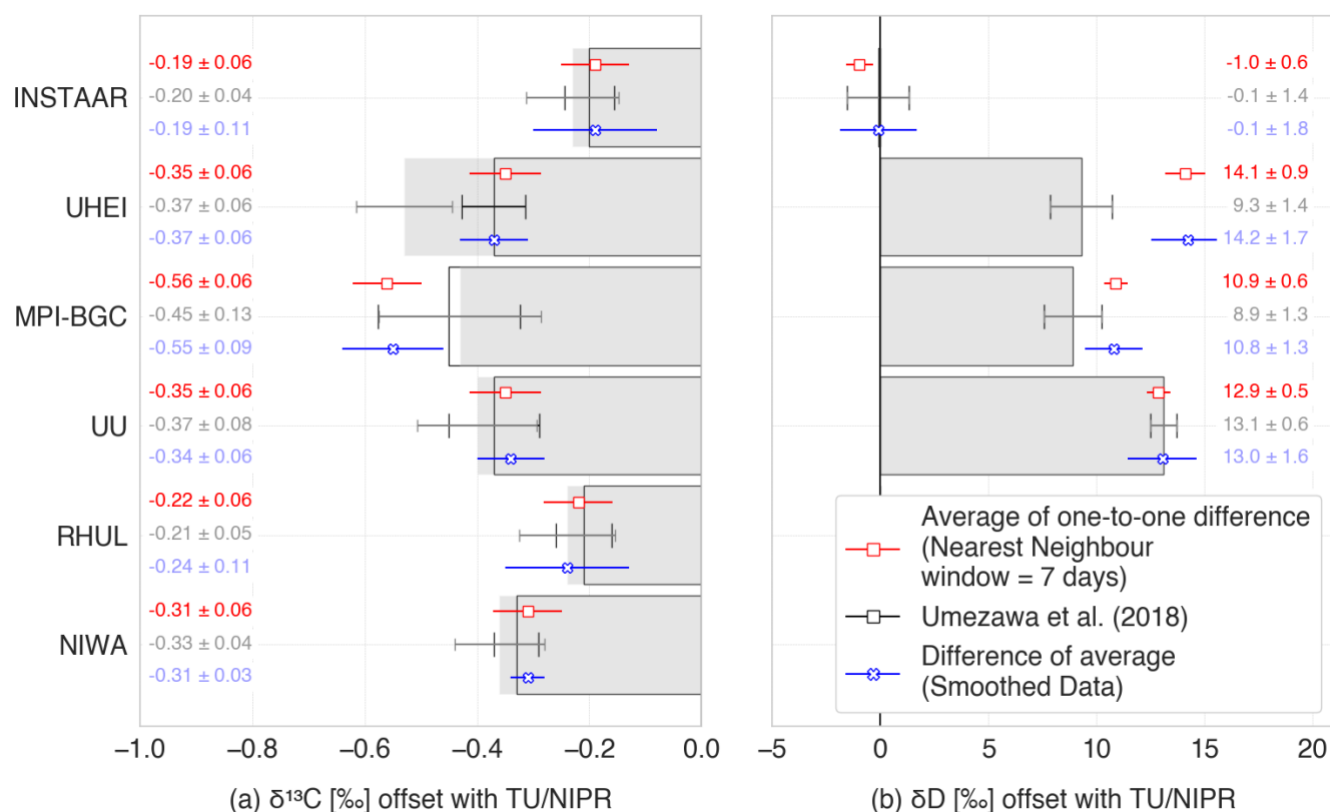

**Figure S1: Interlaboratory offsets for (a)  $\delta^{13}\text{C}$ -CH<sub>4</sub> and (b)  $\delta\text{D}$ -CH<sub>4</sub> with respect to the TU/NIPR. Grey bars indicate rescaled Umezawa et al. (2018) values without the modifications mentioned in Section 2.2.3, and black outlined bars show the results after these modifications. The original results from Umezawa et al. (2018) were calculated for  $\delta^{13}\text{C}$ -CH<sub>4</sub> with NIWA as the reference laboratory and for  $\delta\text{D}$ -CH<sub>4</sub> with UU as the reference laboratory, and these were transferred to the TU/NIPR scale as explained in the main text.**
